# Supplementary material for: Determinants of cesarean delivery: a classification tree analysis
Source: PubMed Central journal article supplement (PMC4090181; doi:10.1186/1471-2393-14-215), 2014-06-28
Supplement: 1471-2393-14-215-S1.pdf [file 1471-2393-14-215-S1.pdf]

## LIST OF DIAGNOSIS-RELATED GROUPS, DIAGNOSIS AND PROCEDURE CODES INCLUDED IN THE STUDY

### List of diagnosis-related groups

---

|     |                                                                                                   |
|-----|---------------------------------------------------------------------------------------------------|
| 370 | Cesarean section with comorbidity or complications                                                |
| 371 | Cesarean section without comorbidity or complications                                             |
| 372 | Vaginal delivery with complicating diagnoses                                                      |
| 373 | Vaginal delivery without complicating diagnoses                                                   |
| 374 | Vaginal delivery with sterilization and/or dilation and curettage                                 |
| 375 | Vaginal delivery with operating room procedure except sterilization and/or dilation and curettage |

---

### List of ICD-9-CM diagnosis codes

---

|       |                                                                                                                                                             |
|-------|-------------------------------------------------------------------------------------------------------------------------------------------------------------|
| 64001 | Threatened abortion, delivered, with or without mention of antepartum condition                                                                             |
| 64081 | Other specified hemorrhage in early pregnancy, delivered, with or without mention of antepartum condition                                                   |
| 64091 | Unspecified hemorrhage in early pregnancy, delivered, with or without mention of antepartum condition                                                       |
| 64101 | Placenta previa without hemorrhage, delivered, with or without mention of antepartum condition                                                              |
| 64111 | Hemorrhage from placenta previa, delivered, with or without mention of antepartum condition                                                                 |
| 64121 | Premature separation of placenta, delivered, with or without mention of antepartum condition                                                                |
| 64131 | Antepartum hemorrhage associated with coagulation defects, delivered, with or without mention of antepartum condition                                       |
| 64181 | Other antepartum hemorrhage, delivered, with or without mention of antepartum condition                                                                     |
| 64191 | Unspecified antepartum hemorrhage, delivered, with or without mention of antepartum condition                                                               |
| 64201 | Benign essential hypertension complicating pregnancy, childbirth, and the puerperium, delivered, with or without mention of antepartum condition            |
| 64202 | Benign essential hypertension, complicating pregnancy, childbirth, and the puerperium, delivered, with mention of postpartum complication                   |
| 64211 | Hypertension secondary to renal disease, complicating pregnancy, childbirth, and the puerperium, delivered, with or without mention of antepartum condition |
| 64212 | Hypertension secondary to renal disease, complicating pregnancy, childbirth, and the puerperium, delivered, with mention of postpartum complication         |
| 64221 | Other pre-existing hypertension, complicating pregnancy, childbirth, and the puerperium, delivered, with or without mention of antepartum condition         |
| 64222 | Other pre-existing hypertension, complicating pregnancy, childbirth, and the puerperium, delivered, with mention of postpartum complication                 |
| 64231 | Transient hypertension of pregnancy, delivered, with or without mention of antepartum condition                                                             |
| 64232 | Transient hypertension of pregnancy, delivered, with mention of postpartum complication                                                                     |
| 64241 | Mild or unspecified pre-eclampsia, delivered, with or without mention of antepartum condition                                                               |
| 64242 | Mild or unspecified pre-eclampsia, delivered, with mention of postpartum complication                                                                       |
| 64251 | Severe pre-eclampsia, delivered, with or without mention of antepartum condition                                                                            |
| 64252 | Severe pre-eclampsia, delivered, with mention of postpartum complication                                                                                    |
| 64261 | Eclampsia, delivered, with or without mention of antepartum condition                                                                                       |
| 64262 | Eclampsia, delivered, with mention of postpartum complication                                                                                               |
| 64271 | Pre-eclampsia or eclampsia superimposed on pre-existing hypertension, delivered, with or without mention of antepartum condition                            |
| 64272 | Pre-eclampsia or eclampsia superimposed on pre-existing hypertension, delivered, with mention of postpartum complication                                    |
| 64291 | Unspecified hypertension complicating pregnancy, childbirth, or the puerperium, delivered, with or without mention of antepartum condition                  |
| 64292 | Unspecified hypertension complicating pregnancy, childbirth, or the puerperium, delivered, with mention of postpartum complication                          |
| 64301 | Mild hyperemesis gravidarum, delivered, with or without mention of antepartum condition                                                                     |
| 64311 | Hyperemesis gravidarum with metabolic disturbance, delivered, with or without mention of antepartum condition                                               |

64321 Late vomiting of pregnancy, delivered, with or without mention of antepartum condition  
64381 Other vomiting complicating pregnancy, delivered, with or without mention of antepartum condition  
64391 Unspecified vomiting of pregnancy, delivered, with or without mention of antepartum condition  
64421 Early onset of delivery, delivered, with or without mention of antepartum condition  
64511 Post term pregnancy, delivered, with or without mention of antepartum condition  
64521 Prolonged pregnancy, delivered, with or without mention of antepartum condition  
64601 Papyraceous fetus, delivered, with or without mention of antepartum condition  
64611 Edema or excessive weight gain in pregnancy, without mention of hypertension, delivered, with or without mention of antepartum complication  
64612 Edema or excessive weight gain in pregnancy, without mention of hypertension, delivered, with mention of postpartum complication  
64621 Unspecified renal disease in pregnancy, without mention of hypertension, delivered, with or without mention of antepartum condition  
64622 Unspecified renal disease in pregnancy, without mention of hypertension, delivered, with mention of postpartum complication  
64631 Recurrent pregnancy loss, delivered, with or without mention of antepartum condition  
64641 Peripheral neuritis in pregnancy, delivered, with or without mention of antepartum condition  
64642 Peripheral neuritis in pregnancy, delivered, with mention of postpartum complication  
64651 Asymptomatic bacteriuria in pregnancy, delivered, with or without mention of antepartum condition  
64652 Asymptomatic bacteriuria in pregnancy, delivered, with mention of postpartum complication  
64661 Infections of genitourinary tract in pregnancy, delivered, with or without mention of antepartum condition  
64662 Infections of genitourinary tract in pregnancy, delivered, with mention of postpartum complication  
64671 Liver and biliary tract disorders in pregnancy, delivered, with or without mention of antepartum condition  
64681 Other specified complications of pregnancy, delivered, with or without mention of antepartum condition  
64682 Other specified complications of pregnancy, delivered, with mention of postpartum complication  
64691 Unspecified complication of pregnancy, delivered, with or without mention of antepartum condition  
64701 Syphilis of mother, complicating pregnancy, childbirth, or the puerperium, delivered, with or without mention of antepartum condition  
64702 Syphilis of mother, complicating pregnancy, childbirth, or the puerperium, delivered, with mention of postpartum complication  
64711 Gonorrhea of mother, complicating pregnancy, childbirth, or the puerperium, delivered, with or without mention of antepartum condition  
64712 Gonorrhea of mother, complicating pregnancy, childbirth, or the puerperium, delivered, with mention of postpartum complication  
64721 Other venereal diseases of mother, complicating pregnancy, childbirth, or the puerperium, delivered, with or without mention of antepartum condition  
64722 Other venereal diseases of mother, complicating pregnancy, childbirth, or the puerperium, delivered, with mention of postpartum complication  
64731 Tuberculosis of mother, complicating pregnancy, childbirth, or the puerperium, delivered, with or without mention of antepartum condition  
64732 Tuberculosis of mother, complicating pregnancy, childbirth, or the puerperium, delivered, with mention of postpartum complication  
64741 Malaria in the mother, delivered, with or without mention of antepartum condition  
64742 Malaria in the mother, delivered, with mention of postpartum complication  
64751 Rubella in the mother, delivered, with or without mention of antepartum condition  
64752 Rubella in the mother, delivered, with mention of postpartum complication  
64761 Other viral diseases in the mother, delivered, with or without mention of antepartum condition  
64762 Other viral diseases in the mother, delivered, with mention of postpartum complication  
64781 Other specified infectious and parasitic diseases of mother, delivered, with or without mention of antepartum condition  
64782 Other specified infectious and parasitic diseases of mother, delivered, with mention of postpartum complication  
64791 Unspecified infection or infestation of mother, delivered, with or without mention of antepartum condition  
64792 Unspecified infection or infestation of mother, delivered, with mention of postpartum complication  
64801 Diabetes mellitus of mother, complicating pregnancy, childbirth, or the puerperium, delivered, with or without mention of antepartum condition

64802 Diabetes mellitus of mother, complicating pregnancy, childbirth, or the puerperium, delivered, with mention of postpartum complication  
64811 Thyroid dysfunction of mother, delivered, with or without mention of antepartum condition  
64812 Thyroid dysfunction of mother, delivered, with mention of postpartum complication  
64821 Anemia of mother, delivered, with or without mention of antepartum condition  
64822 Anemia of mother, delivered, with mention of postpartum complication  
64831 Drug dependence of mother, delivered, with or without mention of antepartum condition  
64832 Drug dependence of mother, delivered, with mention of postpartum complication  
64841 Mental disorders of mother, delivered, with or without mention of antepartum condition  
64842 Mental disorders of mother, delivered, with mention of postpartum complication  
64851 Congenital cardiovascular disorders of mother, delivered, with or without mention of antepartum condition  
64852 Congenital cardiovascular disorders of mother, delivered, with mention of postpartum complication  
64861 Other cardiovascular diseases of mother, delivered, with or without mention of antepartum condition  
64862 Other cardiovascular diseases of mother, delivered, with mention of postpartum complication  
64871 Bone and joint disorders of back, pelvis, and lower limbs of mother, delivered, with or without mention of antepartum condition  
64872 Bone and joint disorders of back, pelvis, and lower limbs of mother, delivered, with mention of postpartum complication  
64881 Abnormal glucose tolerance of mother, delivered, with or without mention of antepartum condition  
64882 Abnormal glucose tolerance of mother, delivered, with mention of postpartum complication  
64891 Other current conditions classifiable elsewhere of mother, delivered, with or without mention of antepartum condition  
64892 Other current conditions classifiable elsewhere of mother, delivered, with mention of postpartum complication  
64901 Tobacco use disorder complicating pregnancy, childbirth, or the puerperium, delivered, with or without mention of antepartum condition  
64902 Tobacco use disorder complicating pregnancy, childbirth, or the puerperium, delivered, with mention of postpartum complication  
64911 Obesity complicating pregnancy, childbirth, or the puerperium, delivered, with or without mention of antepartum condition  
64912 Obesity complicating pregnancy, childbirth, or the puerperium, delivered, with mention of postpartum complication  
64921 Bariatric surgery status complicating pregnancy, childbirth, or the puerperium, delivered, with or without mention of antepartum condition  
64922 Bariatric surgery status complicating pregnancy, childbirth, or the puerperium, delivered, with mention of postpartum complication  
64931 Coagulation defects complicating pregnancy, childbirth, or the puerperium, delivered, with or without mention of antepartum condition  
64932 Coagulation defects complicating pregnancy, childbirth, or the puerperium, delivered, with mention of postpartum complication  
64941 Epilepsy complicating pregnancy, childbirth, or the puerperium, delivered, with or without mention of antepartum condition  
64942 Epilepsy complicating pregnancy, childbirth, or the puerperium, delivered, with mention of postpartum complication  
64951 Spotting complicating pregnancy, delivered, with or without mention of antepartum condition  
64961 Uterine size date discrepancy, delivered, with or without mention of antepartum condition  
64962 Uterine size date discrepancy, delivered, with mention of postpartum complication  
64971 Cervical shortening, delivered, with or without mention of antepartum condition  
64981 Onset (spontaneous) of labor after 37 completed weeks of gestation but before 39 completed weeks gestation, with delivery by (planned) cesarean section, delivered, with or without mention of antepartum condition  
64982 Onset (spontaneous) of labor after 37 completed weeks of gestation but before 39 completed weeks gestation, with delivery by (planned) cesarean section, delivered, with mention of postpartum complication  
65101 Twin pregnancy, delivered, with or without mention of antepartum condition  
65111 Triplet pregnancy, delivered, with or without mention of antepartum condition  
65121 Quadruplet pregnancy, delivered, with or without mention of antepartum condition  
65131 Twin pregnancy with fetal loss and retention of one fetus, delivered, with or without mention of antepartum condition

65141 Triplet pregnancy with fetal loss and retention of one or more fetus(es), delivered, with or without mention of antepartum condition  
65151 Quadruplet pregnancy with fetal loss and retention of one or more fetus(es), delivered, with or without mention of antepartum condition  
65161 Other multiple pregnancy with fetal loss and retention of one or more fetus(es), delivered, with or without mention of antepartum condition  
65171 Multiple gestation following (elective) fetal reduction, delivered, with or without mention of antepartum condition  
65181 Other specified multiple gestation, delivered, with or without mention of antepartum condition  
65191 Unspecified multiple gestation, delivered, with or without mention of antepartum condition  
65201 Unstable lie, delivered, with or without mention of antepartum condition  
65211 Breech or other malpresentation successfully converted to cephalic presentation, delivered, with or without mention of antepartum condition  
65221 Breech presentation without mention of version, delivered, with or without mention of antepartum condition  
65231 Transverse or oblique presentation, delivered, with or without mention of antepartum condition  
65241 Face or brow presentation, delivered, with or without mention of antepartum condition  
65251 High head at term, delivered, with or without mention of antepartum condition  
65261 Multiple gestation with malpresentation of one fetus or more, delivered, with or without mention of antepartum condition  
65271 Prolapsed arm of fetus, delivered, with or without mention of antepartum condition  
65281 Other specified malposition or malpresentation, delivered, with or without mention of antepartum condition  
65291 Unspecified malposition or malpresentation, delivered, with or without mention of antepartum condition  
65301 Major abnormality of bony pelvis, not further specified, delivered, with or without mention of antepartum condition  
65311 Generally contracted pelvis, delivered, with or without mention of antepartum condition  
65321 Inlet contraction of pelvis, delivered, with or without mention of antepartum condition  
65331 Outlet contraction of pelvis, delivered, with or without mention of antepartum condition  
65341 Fetopelvic disproportion, delivered, with or without mention of antepartum condition  
65351 Unusually large fetus causing disproportion, delivered, with or without mention of antepartum condition  
65361 Hydrocephalic fetus causing disproportion, delivered, with or without mention of antepartum condition  
65371 Other fetal abnormality causing disproportion, delivered, with or without mention of antepartum condition  
65381 Disproportion of other origin, delivered, with or without mention of antepartum condition  
65391 Unspecified disproportion, delivered, with or without mention of antepartum condition  
65401 Congenital abnormalities of uterus, delivered, with or without mention of antepartum condition  
65402 Congenital abnormalities of uterus, delivered, with mention of postpartum complication  
65411 Tumors of body of uterus, delivered, with or without mention of antepartum condition  
65412 Tumors of body of uterus, delivered, with mention of postpartum complication  
65421 Previous cesarean delivery, delivered, with or without mention of antepartum condition  
65431 Retroverted and incarcerated gravid uterus, delivered, with mention of antepartum condition  
65432 Retroverted and incarcerated gravid uterus, delivered, with mention of postpartum complication  
65441 Other abnormalities in shape or position of gravid uterus and of neighboring structures, delivered, with or without mention of antepartum condition  
65442 Other abnormalities in shape or position of gravid uterus and of neighboring structures, delivered, with mention of postpartum complication  
65451 Cervical incompetence, delivered, with or without mention of antepartum condition  
65452 Cervical incompetence, delivered, with mention of postpartum complication  
65461 Other congenital or acquired abnormality of cervix, delivered, with or without mention of antepartum condition  
65462 Other congenital or acquired abnormality of cervix, delivered, with mention of postpartum complication  
65471 Congenital or acquired abnormality of vagina, delivered, with or without mention of antepartum condition  
65472 Congenital or acquired abnormality of vagina, delivered, with mention of postpartum complication

65481 Congenital or acquired abnormality of vulva, delivered, with or without mention of antepartum condition  
65482 Congenital or acquired abnormality of vulva, delivered, with mention of postpartum complication  
65491 Other and unspecified abnormality of organs and soft tissues of pelvis, delivered, with or without mention of antepartum condition  
65492 Other and unspecified abnormality of organs and soft tissues of pelvis, delivered, with mention of postpartum complication  
65501 Central nervous system malformation in fetus, delivered, with or without mention of antepartum condition  
65511 Chromosomal abnormality in fetus, affecting management of mother, delivered, with or without mention of antepartum condition  
65521 Hereditary disease in family possibly affecting fetus, affecting management of mother, delivered, with or without mention of antepartum condition  
65531 Suspected damage to fetus from viral disease in the mother, affecting management of mother, delivered, with or without mention of antepartum condition  
65541 Suspected damage to fetus from other disease in the mother, affecting management of mother, delivered, with or without mention of antepartum condition  
65551 Suspected damage to fetus from drugs, affecting management of mother, delivered, with or without mention of antepartum condition  
65561 Suspected damage to fetus from radiation, affecting management of mother, delivered,  
65571 Decreased fetal movements, affecting management of mother, delivered, with or without mention of antepartum condition  
65581 Other known or suspected fetal abnormality, not elsewhere classified, affecting management of mother, delivered, with or without mention of antepartum condition  
65591 Unspecified suspected fetal abnormality, affecting management of mother, delivered, with or without mention of antepartum condition  
65601 Fetal-maternal hemorrhage, delivered, with or without mention of antepartum condition  
65611 Rhesus isoimmunization, delivered, with or without mention of antepartum condition  
65621 Isoimmunization from other and unspecified blood-group incompatibility, delivered, with or without mention of antepartum condition  
65631 Fetal distress, affecting management of mother, delivered, with or without mention of antepartum condition  
65641 Intrauterine death, affecting management of mother, delivered, with or without mention of antepartum condition  
65651 Poor fetal growth, affecting management of mother, delivered, with or without mention of antepartum condition  
65661 Excessive fetal growth, affecting management of mother, delivered, with or without mention of antepartum condition  
65671 Other placental conditions, affecting management of mother, delivered, with or without mention of antepartum condition  
65681 Other specified fetal and placental problems, affecting management of mother, delivered, with or without mention of antepartum condition  
65691 Unspecified fetal and placental problem, affecting management of mother, delivered, with or without mention of antepartum condition  
65701 Polyhydramnios, delivered, with or without mention of antepartum condition  
65801 Oligohydramnios, delivered, with or without mention of antepartum condition  
65811 Premature rupture of membranes, delivered, with or without mention of antepartum condition  
65821 Delayed delivery after spontaneous or unspecified rupture of membranes, delivered, with or without mention of antepartum condition  
65831 Delayed delivery after artificial rupture of membranes, delivered, with or without mention of antepartum condition  
65841 Infection of amniotic cavity, delivered, with or without mention of antepartum condition  
65881 Other problems associated with amniotic cavity and membranes, delivered, with or without mention of antepartum condition  
65891 Unspecified problem associated with amniotic cavity and membranes, delivered, with or without mention of antepartum condition  
65901 Failed mechanical induction of labor, delivered, with or without mention of antepartum condition  
65911 Failed medical or unspecified induction of labor, delivered, with or without mention of antepartum condition  
65921 Maternal pyrexia during labor, unspecified, delivered, with or without mention of antepartum condition  
65931 Generalized infection during labor, delivered, with or without mention of antepartum condition  
65941 Grand multiparity, delivered, with or without mention of antepartum condition  
65951 Elderly primigravida, delivered, with or without mention of antepartum condition  
65961 Elderly multigravida, delivered with or without mention of antepartum condition  
65971 Abnormality in fetal heart rate or rhythm, delivered, with or without mention of antepartum condition  
65981 Other specified indications for care or intervention related to labor and delivery, delivered, with or without mention of antepartum condition

65991 Unspecified indication for care or intervention related to labor and delivery, delivered, with or without mention of antepartum condition  
66001 Obstruction caused by malposition of fetus at onset of labor, delivered, with or without mention of antepartum condition  
66011 Obstruction by bony pelvis during labor, delivered, with or without mention of antepartum condition  
66021 Obstruction by abnormal pelvic soft tissues during labor, delivered, with or without mention of antepartum condition  
66031 Deep transverse arrest and persistent occipitoposterior position, delivered, with or without mention of antepartum condition  
66041 Shoulder (girdle) dystocia, delivered, with or without mention of antepartum condition  
66051 Locked twins, delivered, with or without mention of antepartum condition  
66061 Unspecified failed trial of labor, delivered, with or without mention of antepartum condition  
66071 Failed forceps or vacuum extractor, unspecified, delivered, with or without mention of antepartum condition  
66081 Other causes of obstructed labor, delivered, with or without mention of antepartum condition  
66091 Unspecified obstructed labor, delivered, with or without mention of antepartum condition  
66101 Primary uterine inertia, delivered, with or without mention of antepartum condition  
66111 Secondary uterine inertia, delivered, with or without mention of antepartum condition  
66121 Other and unspecified uterine inertia, delivered, with or without mention of antepartum condition  
66131 Precipitate labor, delivered, with or without mention of antepartum condition  
66141 Hypertonic, incoordinate, or prolonged uterine contractions, delivered, with or without mention of antepartum condition  
66191 Unspecified abnormality of labor, delivered, with or without mention of antepartum condition  
66201 Prolonged first stage of labor, delivered, with or without mention of antepartum condition  
66211 Unspecified prolonged labor, delivered, with or without mention of antepartum condition  
66221 Prolonged second stage of labor, delivered, with or without mention of antepartum condition  
66231 Delayed delivery of second twin, triplet, etc., delivered, with or without mention of antepartum condition  
66301 Prolapse of cord complicating labor and delivery, delivered, with or without mention of antepartum condition  
66311 Cord around neck, with compression, complicating labor and delivery, delivered, with or without mention of antepartum condition  
66321 Other and unspecified cord entanglement, with compression, complicating labor and delivery, delivered, with or without mention of antepartum condition  
66331 Other and unspecified cord entanglement, without mention of compression, complicating labor and delivery, delivered, with or without mention of antepartum condition  
66341 Short cord complicating labor and delivery, delivered, with or without mention of antepartum condition  
66351 Vasa previa complicating labor and delivery, delivered, with or without mention of antepartum condition  
66361 Vascular lesions of cord complicating labor and delivery, delivered, with or without mention of antepartum condition  
66381 Other umbilical cord complications complicating labor and delivery, delivered, with or without mention of antepartum condition  
66391 Unspecified umbilical cord complication complicating labor and delivery, delivered, with or without mention of antepartum condition  
66401 First-degree perineal laceration, delivered, with or without mention of antepartum condition  
66411 Second-degree perineal laceration, delivered, with or without mention of antepartum condition  
66421 Third-degree perineal laceration, delivered, with or without mention of antepartum condition  
66431 Fourth-degree perineal laceration, delivered, with or without mention of antepartum condition  
66441 Unspecified perineal laceration, delivered, with or without mention of antepartum condition  
66451 Vulvar and perineal hematoma, delivered, with or without mention of antepartum condition  
66461 Anal sphincter tear complicating delivery, not associated with third-degree perineal laceration, delivered, with or without mention of antepartum condition  
66481 Other specified trauma to perineum and vulva, delivered, with or without mention of antepartum condition  
66491 Unspecified trauma to perineum and vulva, delivered, with or without mention of antepartum condition  
66501 Rupture of uterus before onset of labor, delivered, with or without mention of antepartum condition  
66511 Rupture of uterus during labor, delivered, with or without mention of antepartum condition

66522 Inversion of uterus, delivered, with mention of postpartum complication  
66531 Laceration of cervix, delivered, with or without mention of antepartum condition  
66541 High vaginal laceration, delivered, with or without mention of antepartum condition  
66551 Other injury to pelvic organs, delivered, with or without mention of antepartum condition  
66561 Damage to pelvic joints and ligaments, delivered, with or without mention of antepartum condition  
66571 Pelvic hematoma, delivered, with or without mention of antepartum condition  
66572 Pelvic hematoma, delivered with mention of postpartum complication  
66581 Other specified obstetrical trauma, delivered, with or without mention of antepartum condition  
66582 Other specified obstetrical trauma, delivered, with mention of postpartum complication  
66591 Unspecified obstetrical trauma, delivered, with or without mention of antepartum condition  
66592 Unspecified obstetrical trauma, delivered, with mention of postpartum complication  
66602 Third-stage postpartum hemorrhage, delivered, with mention of postpartum complication  
66612 Other immediate postpartum hemorrhage, delivered, with mention of postpartum complication  
66622 Delayed and secondary postpartum hemorrhage, delivered, with mention of postpartum complication  
66632 Postpartum coagulation defects, delivered, with mention of postpartum complication  
66702 Retained placenta without hemorrhage, delivered, with mention of postpartum complication  
66712 Retained portions of placenta or membranes, without hemorrhage, delivered, with mention of postpartum complication  
66801 Pulmonary complications of anesthesia or other sedation in labor and delivery, delivered, with or without mention of antepartum condition  
66802 Pulmonary complications of anesthesia or other sedation in labor and delivery, delivered, with mention of postpartum complication  
66811 Cardiac complications of anesthesia or other sedation in labor and delivery, delivered, with or without mention of antepartum condition  
66812 Cardiac complications of anesthesia or other sedation in labor and delivery, delivered, with mention of postpartum complication  
66821 Central nervous system complications of anesthesia or other sedation in labor and delivery, delivered, with or without mention of antepartum condition  
66822 Central nervous system complications of anesthesia or other sedation in labor and delivery, delivered, with mention of postpartum complication  
66881 Other complications of anesthesia or other sedation in labor and delivery, delivered, with or without mention of antepartum condition  
66882 Other complications of anesthesia or other sedation in labor and delivery, delivered, with mention of postpartum complication  
66891 Unspecified complication of anesthesia and other sedation in labor and delivery, delivered, with or without mention of antepartum condition  
66892 Unspecified complication of anesthesia and other sedation in labor and delivery, delivered, with mention of postpartum complication  
66901 Maternal distress complicating labor and delivery, delivered, with or without mention of antepartum condition  
66902 Maternal distress complicating labor and delivery, delivered, with mention of postpartum complication  
66911 Shock during or following labor and delivery, delivered, with or without mention of antepartum condition  
66912 Shock during or following labor and delivery, delivered, with mention of postpartum complication  
66921 Maternal hypotension syndrome, delivered, with or without mention of antepartum condition  
66922 Maternal hypotension syndrome, delivered, with mention of postpartum complication  
66932 Acute kidney failure following labor and delivery, delivered, with mention of postpartum complication  
66941 Other complications of obstetrical surgery and procedures, delivered, with or without mention of antepartum condition  
66942 Other complications of obstetrical surgery and procedures, delivered, with mention of postpartum complication  
66951 Forceps or vacuum extractor delivery without mention of indication, delivered, with or without mention of antepartum condition  
66961 Breech extraction, without mention of indication, delivered, with or without mention of antepartum condition  
66971 Cesarean delivery, without mention of indication, delivered, with or without mention of antepartum condition  
66981 Other complications of labor and delivery, delivered, with or without mention of antepartum condition  
66982 Other complications of labor and delivery, delivered, with mention of postpartum complication

66991 Unspecified complication of labor and delivery, delivered, with or without mention of antepartum condition  
66992 Unspecified complication of labor and delivery, delivered, with mention of postpartum complication  
67002 Major puerperal infection, delivered, with mention of postpartum complication  
67012 Puerperal endometritis, delivered, with mention of postpartum complication  
67022 Puerperal sepsis, delivered, with mention of postpartum complication  
67032 Puerperal septic thrombophlebitis, delivered, with mention of postpartum complication  
67082 Other major puerperal infection, delivered, with mention of postpartum complication  
67101 Varicose veins of legs complicating pregnancy and the puerperium, delivered, with or without mention of antepartum condition  
67102 Varicose veins of legs complicating pregnancy and the puerperium, delivered, with mention of postpartum complication  
67111 Varicose veins of vulva and perineum complicating pregnancy and the puerperium, delivered, with or without mention of antepartum condition  
67112 Varicose veins of vulva and perineum complicating pregnancy and the puerperium, delivered, with mention of postpartum complication  
67121 Superficial thrombophlebitis complicating pregnancy and the puerperium, delivered, with or without mention of antepartum condition  
67122 Superficial thrombophlebitis complicating pregnancy and the puerperium, delivered, with mention of postpartum complication  
67131 Deep phlebothrombosis, antepartum, delivered, with or without mention of antepartum condition  
67142 Deep phlebothrombosis, postpartum, delivered, with mention of postpartum complication  
67151 Other phlebitis and thrombosis complicating pregnancy and the puerperium, delivered, with or without mention of antepartum condition  
67152 Other phlebitis and thrombosis complicating pregnancy and the puerperium, delivered, with mention of postpartum complication  
67181 Other venous complications of pregnancy and the puerperium, delivered, with or without mention of antepartum condition  
67182 Other venous complications of pregnancy and the puerperium, delivered, with mention of postpartum complication  
67191 Unspecified venous complication of pregnancy and the puerperium, delivered, with or without mention of antepartum condition  
67192 Unspecified venous complication of pregnancy and the puerperium, delivered, with mention of postpartum complication  
67202 Pyrexia of unknown origin during the puerperium, delivered, with mention of postpartum complication  
67301 Obstetrical air embolism, delivered, with or without mention of antepartum condition  
67302 Obstetrical air embolism, delivered, with mention of postpartum complication  
67311 Amniotic fluid embolism, delivered, with or without mention of antepartum condition  
67312 Amniotic fluid embolism, delivered, with mention of postpartum complication  
67321 Obstetrical blood-clot embolism, delivered, with or without mention of antepartum condition  
67322 Obstetrical blood-clot embolism, delivered, with mention of postpartum complication  
67331 Obstetrical pyemic and septic embolism, delivered, with or without mention of antepartum condition  
67332 Obstetrical pyemic and septic embolism, delivered, with mention of postpartum complication  
67381 Other obstetrical pulmonary embolism, delivered, with or without mention of antepartum condition  
67382 Other obstetrical pulmonary embolism, delivered, with mention of postpartum complication  
67401 Cerebrovascular disorders in the puerperium, delivered, with or without mention of antepartum condition  
67402 Cerebrovascular disorders in the puerperium, delivered, with mention of postpartum complication  
67412 Disruption of cesarean wound, delivered, with mention of postpartum complication  
67422 Disruption of perineal wound, delivered, with mention of postpartum complication  
67432 Other complications of obstetrical surgical wounds, delivered, with mention of postpartum complication  
67442 Placental polyp, delivered, with mention of postpartum complication  
67451 Peripartum cardiomyopathy, delivered, with or without mention of antepartum condition  
67452 Peripartum cardiomyopathy, delivered, with mention of postpartum condition  
67482 Other complications of puerperium, delivered, with mention of postpartum complication

67492 Unspecified complications of puerperium, delivered, with mention of postpartum complication  
67501 Infections of nipple associated with childbirth, delivered, with or without mention of antepartum condition  
67502 Infections of nipple associated with childbirth, delivered, with mention of postpartum complication  
67511 Abscess of breast associated with childbirth, delivered, with or without mention of antepartum condition  
67512 Abscess of breast associated with childbirth, delivered, with mention of postpartum complication  
67521 Nonpurulent mastitis associated with childbirth, delivered, with or without mention of antepartum condition  
67522 Nonpurulent mastitis associated with childbirth, delivered, with mention of postpartum complication  
67581 Other specified infections of the breast and nipple associated with childbirth, delivered, with or without mention of antepartum condition  
67582 Other specified infections of the breast and nipple associated with childbirth, delivered, with mention of postpartum complication  
67591 Unspecified infection of the breast and nipple associated with childbirth, delivered, with or without mention of antepartum condition  
67592 Unspecified infection of the breast and nipple associated with childbirth, delivered, with mention of postpartum complication  
67601 Retracted nipple associated with childbirth, delivered, with or without mention of antepartum condition  
67602 Retracted nipple associated with childbirth, delivered, with mention of postpartum complication  
67611 Cracked nipple associated with childbirth, delivered, with or without mention of antepartum condition  
67612 Cracked nipple associated with childbirth, delivered, with mention of postpartum complication  
67621 Engorgement of breasts associated with childbirth, delivered, with or without mention of antepartum condition  
67622 Engorgement of breasts associated with childbirth, delivered, with mention of postpartum complication  
67631 Other and unspecified disorder of breast associated with childbirth, delivered, with or without mention of antepartum condition  
67632 Other and unspecified disorder of breast associated with childbirth, delivered, with mention of postpartum complication  
67641 Failure of lactation, delivered, with or without mention of antepartum condition  
67642 Failure of lactation, delivered, with mention of postpartum complication  
67651 Suppressed lactation, delivered, with or without mention of antepartum condition  
67652 Suppressed lactation, delivered, with mention of postpartum complication  
67661 Galactorrhea associated with childbirth, delivered, with or without mention of antepartum condition  
67662 Galactorrhea associated with childbirth, delivered, with mention of postpartum complication  
67681 Other disorders of lactation, delivered, with or without mention of antepartum condition  
67682 Other disorders of lactation, delivered, with mention of postpartum complication  
67691 Unspecified disorder of lactation, delivered, with or without mention of antepartum condition  
67692 Unspecified disorder of lactation, delivered, with mention of postpartum complication

---

### **List of ICD-9-CM procedure codes**

---

720 Low forceps operation  
721 Low forceps operation with episiotomy  
7221 Mid forceps operation with episiotomy  
7229 Other mid forceps operation  
7231 High forceps operation with episiotomy  
7239 Other high forceps operation  
724 Forceps rotation of fetal head  
7251 Partial breech extraction with forceps to aftercoming head  
7253 Other partial breech extraction

7254 Total breech extraction with forceps to aftercoming head  
726 Forceps application to aftercoming head  
7271 Vacuum extraction with episiotomy  
7279 Other vacuum extraction  
728 Other specified instrumental delivery  
729 Unspecified instrumental delivery  
7321 Internal and combined version without extraction  
7322 Internal and combined version with extraction  
7351 Manual rotation of fetal head  
7359 Other manually assisted delivery  
736 Episiotomy  
738 Operations on fetus to facilitate delivery  
7391 External version  
7392 Replacement of prolapsed umbilical cord  
7393 Incision of cervix to assist delivery  
7394 Pubiotomy to assist delivery  
7399 Other  
740 Classical cesarean section  
741 Low cervical cesarean section  
742 Extraperitoneal cesarean section  
744 Cesarean section of other specified type  
7499 Other cesarean section of unspecified type

---
